# Supplementary material
Source: HighWire-hosted journal article supplement (https://bmjopen.bmj.com/content/8/4/e019398)
Supplement: inline-supplementary-material-4 [file inline-supplementary-material-4.pdf]

## WHO Trial Registration Data Set (Version 1.2.1)

|    | Data category                                 | Information                                                                                                                                                                                         |
|----|-----------------------------------------------|-----------------------------------------------------------------------------------------------------------------------------------------------------------------------------------------------------|
| 1  | Primary Registry and Trial Identifying Number | German Clinical Trial Register<br>DRKS00010995                                                                                                                                                      |
| 2  | Date of Registration in Primary Registry      | 23 August, 2017                                                                                                                                                                                     |
| 3  | Secondary Identifying Numbers                 | The Universal Trial Number (UTN) U1111-1186-5784                                                                                                                                                    |
| 4  | Source(s) of Monetary or Material Support     | Apothekerstiftung Westfalen-Lippe (noncommercial foundation)                                                                                                                                        |
| 5  | Primary Sponsor                               | Susanne Erzkamp, Elefanten-Apotheke gegr. 1575, Steinstr. 14, 48565 Steinfurt, Germany                                                                                                              |
| 6  | Secondary Sponsor(s)                          |                                                                                                                                                                                                     |
| 7  | Contact for Public Queries                    | Susanne Erzkamp, Elefanten-Apotheke gegr. 1575, Steinstr. 14, 48565 Steinfurt, Germany<br><br>Telephone: 0049 2551 5435<br><br>Fax: 0049 2551 6236<br><br>Email: amber-study@gmx.de                 |
| 8  | Contact for Scientific Queries                | 7                                                                                                                                                                                                   |
| 9  | Public Title                                  | Medication Management in nursing homes- AMBER study                                                                                                                                                 |
| 10 | Scientific Title                              | Development and evaluation of an algorithm in Medication Management for best practice. Effectiveness of the intervention and translation into standard care for nursing home residents              |
| 11 | Countries of Recruitment                      | Germany                                                                                                                                                                                             |
| 12 | Health Condition(s) or Problem(s) Studied     | Multimorbidity                                                                                                                                                                                      |
| 13 | Intervention(s)                               | A Medication Management for residents of nursing homes will be performed by pharmacists in collaboration with physicians and nurses by means of an innovative algorithm. There is no control group. |
| 4  |                                               | Inclusion Criteria<br>Age: < 65 years                                                                                                                                                               |

|    |                                      |                                                                                                                                                                                                                                                                                                                                                                                                                                                                                        |
|----|--------------------------------------|----------------------------------------------------------------------------------------------------------------------------------------------------------------------------------------------------------------------------------------------------------------------------------------------------------------------------------------------------------------------------------------------------------------------------------------------------------------------------------------|
|    | Key Inclusion and Exclusion Criteria | <p>Sex: both</p> <p>Residency in a nursing home facility</p> <p>multimorbidity (at least 2 chronic diseases)</p> <p>polymedication (at least 5 chronic systemic available medications)</p> <p>signed informed consent (if necessary through a legally authorized representative)</p> <p>Exclusion Criteria:</p> <p>participation in other clinical studies at present time</p>                                                                                                         |
| 15 | Study Type                           | <p>Interventional</p> <p>single-armed, prospective study design without randomization and blinding</p>                                                                                                                                                                                                                                                                                                                                                                                 |
| 16 | Date of First Enrollment             | 25 August 2017 (planned)                                                                                                                                                                                                                                                                                                                                                                                                                                                               |
| 17 | Target Sample Size                   | 100                                                                                                                                                                                                                                                                                                                                                                                                                                                                                    |
| 18 | Recruitment Status                   | Recruiting                                                                                                                                                                                                                                                                                                                                                                                                                                                                             |
| 19 | Primary outcome(s)                   | change in the number of drug-related problems (DRPs), classified according to PCNE version 8.01 and detected by using the algorithm                                                                                                                                                                                                                                                                                                                                                    |
| 20 | Key Secondary Outcomes               | <ul style="list-style-type: none"> <li>- DRPs classified according to PCNE version 8.01 (number and type)</li> <li>- Acceptance measurement of physicians and nurses by using an acceptance form, classified according to PCNE version 8.01</li> <li>- Number of DRPs classified according to PCNE version 8.01, detected by an advanced Medication Review</li> <li>- Reproducibility of analysis and feasibility of the algorithm (time spending, inter-rater reliability)</li> </ul> |
